# Supplementary figures and images for: LRP1B mutations are associated with favorable outcomes to immune checkpoint inhibitors across multiple cancer types
Source: HighWire-hosted journal article supplement (doi:10.1136/jitc-2020-001792), 2021-03-01

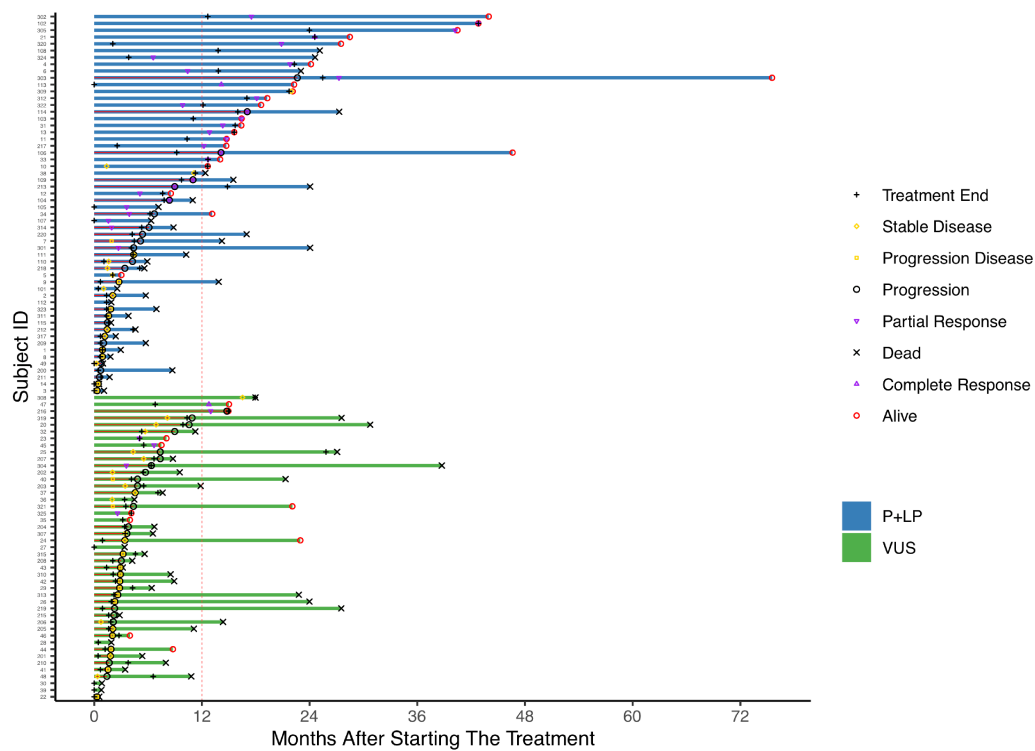

Supplement: jitc-2020-001792supp002_data_supplement.pdf [file jitc-2020-001792supp002_data_supplement.pdf]

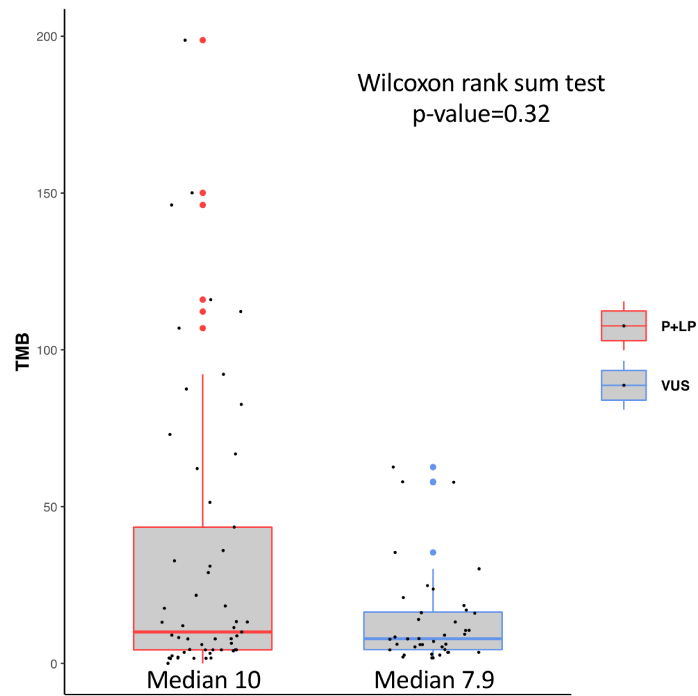

Supplement: jitc-2020-001792supp003_data_supplement.pdf [file jitc-2020-001792supp003_data_supplement.pdf]

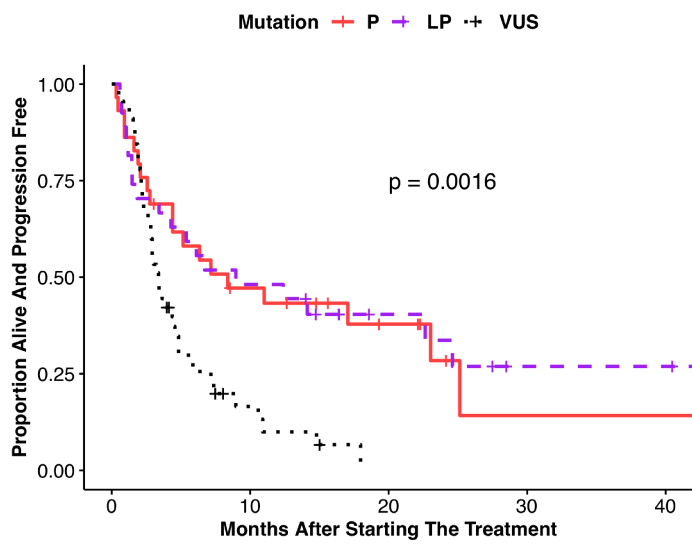

Number at risk

|     |    |    |   |   |   |
|-----|----|----|---|---|---|
| P   | 29 | 12 | 6 | 1 | 1 |
| LP  | 27 | 13 | 6 | 2 | 2 |
| VUS | 45 | 5  | 0 | 0 | 0 |

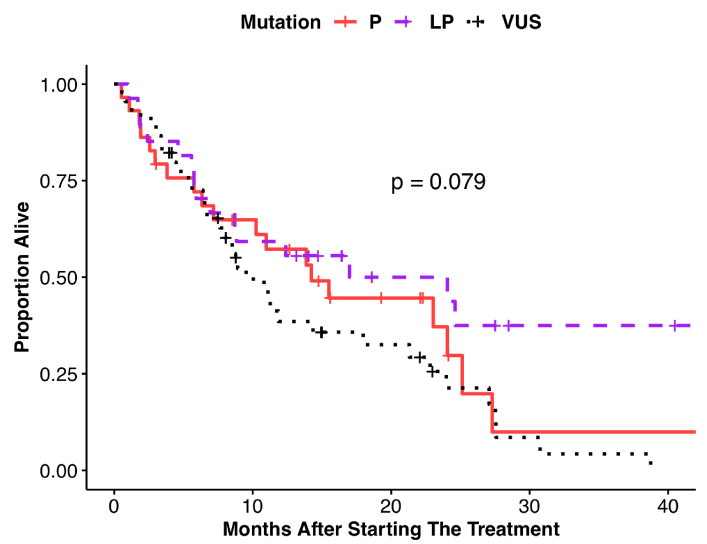

Number at risk

|     |    |    |    |   |   |
|-----|----|----|----|---|---|
| P   | 29 | 17 | 8  | 1 | 1 |
| LP  | 27 | 16 | 8  | 4 | 4 |
| VUS | 45 | 18 | 10 | 2 | 0 |

Supplement: jitc-2020-001792supp004_data_supplement.pdf [file jitc-2020-001792supp004_data_supplement.pdf]
